# Supplementary material
Source: Springer Nature journal article supplement (https://www.springermedizin.de/resource/supplementary/12967_2013_1826_MOESM3_ESM.pdf/9574924)

**A**

Pre-Diagnostic

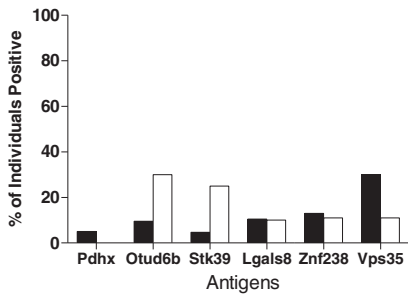**B**

Tumor Bearing

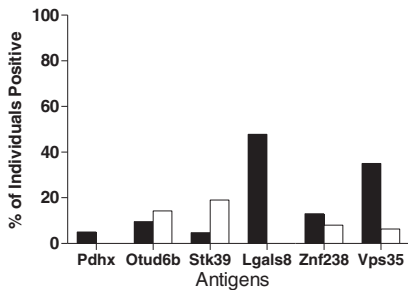**C**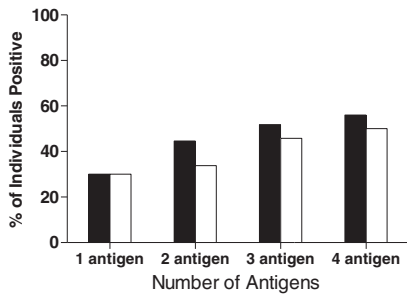**D**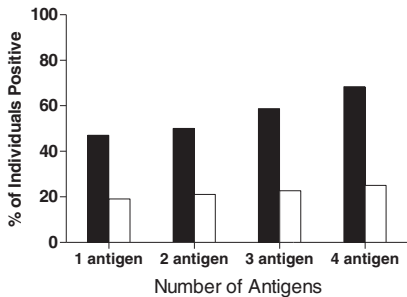

Supplement: MOESM3 [file 9574924]
